# Supplementary material for: Common Feeding Practices Pose A Risk to the Welfare of Horses When Kept on Non-Edible Bedding
Source: PubMed Central journal article supplement (PMC7142811; doi:10.3390/ani10030411), 2020-03-02
Supplement: animals-10-00411-s001.pdf [file animals-10-00411-s001.pdf]

**Table S1: Total time for finishing the evening meal dependent on farm and bedding**

| <b>Farm</b> | <b>Bedding</b> | <b>Duration in minutes</b> |
|-------------|----------------|----------------------------|
| 1           | shaving        | 320                        |
| 1           | shaving        | 334                        |
| 1           | shaving        | 334                        |
| 1           | shaving        | 210                        |
| 1           | shaving        | 290                        |
| 1           | shaving        | 320                        |
| 2           | shaving        | 237                        |
| 2           | shaving        | 312                        |
| 2           | shaving        | 269                        |
| 2           | shaving        | 238                        |
| 2           | shaving        | 206                        |
| 2           | shaving        | 310                        |
| 2           | shaving        | 306                        |
| 2           | shaving        | 307                        |
| 3           | straw          | 360                        |
| 3           | straw          | 310                        |
| 3           | straw          | 344                        |
| 3           | straw          | 343                        |
| 3           | shaving        | 323                        |
| 3           | straw          | 313                        |
| 3           | shaving        | 358                        |
| 4           | shaving        | 273                        |
| 4           | shaving        | 132                        |
| 4           | straw          | 277                        |
| 4           | straw          | 237                        |
| 5           | shaving        | 400                        |
| 5           | shaving        | 182                        |
| 5           | shaving        | 363                        |
| 5           | straw          | 209                        |
| 5           | straw          | 336                        |

|    |         |     |
|----|---------|-----|
| 5  | straw   | 420 |
| 7  | shaving | 333 |
| 7  | shaving | 333 |
| 7  | shaving | 177 |
| 7  | shaving | 239 |
| 7  | shaving | 333 |
| 7  | shaving | 195 |
| 7  | shaving | 263 |
| 8  | shaving | 371 |
| 8  | shaving | 100 |
| 8  | straw   | 339 |
| 8  | shaving | 135 |
| 8  | straw   | 363 |
| 8  | straw   | 325 |
| 9  | straw   | 351 |
| 10 | shaving | 247 |
| 10 | shaving | 300 |
| 10 | shaving | 271 |
| 10 | straw   | 270 |
| 10 | straw   | 235 |
| 10 | straw   | 238 |

**Table S2: Total time for finishing the evening meal dependent on bedding**

| Time for finishing the evening meal for horses on straw (in min) | Time for finishing the evening meal for horses on shavings (in min) |
|------------------------------------------------------------------|---------------------------------------------------------------------|
| 360                                                              | 320                                                                 |
| 310                                                              | 334                                                                 |
| 344                                                              | 334                                                                 |
| 343                                                              | 210                                                                 |
| 313                                                              | 290                                                                 |
| 277                                                              | 320                                                                 |

|               |            |
|---------------|------------|
| 237           | 237        |
| 209           | 312        |
| 336           | 269        |
| 420           | 238        |
| 339           | 206        |
| 363           | 310        |
| 325           | 306        |
| 351           | 307        |
| 270           | 323        |
| 235           | 358        |
| 238           | 273        |
|               | 132        |
|               | 400        |
|               | 182        |
|               | 363        |
|               | 333        |
|               | 333        |
|               | 177        |
|               | 239        |
|               | 333        |
|               | 195        |
|               | 263        |
|               | 371        |
|               | 100        |
|               | 135        |
|               | 247        |
|               | 300        |
|               | 271        |
| <b>Median</b> | <b>307</b> |
| <b>325</b>    | <b>307</b> |

**Table S3: "Horses on shavings", which ate up their evening meal within the observation period (Calculation of the duration of the nocturnal feed intake interruption)**

| Count of CO and DCO-horses | Farm | horse per farm                    | Beginning of evening feed | End of evening feed | Beginning of morning feed | Nocturnal feed intake pause |
|----------------------------|------|-----------------------------------|---------------------------|---------------------|---------------------------|-----------------------------|
| 1                          | 1    | Shavings Boogie                   | 16.45                     | 22.05               | 05.45                     | 460                         |
| 1                          | 1    | Shavings Skippa                   | 16.45                     | 22.19               | 05.45                     | 446                         |
| 1                          | 1    | Shavings Snappy                   | 16.46                     | 20.16               | 05.45                     | 632                         |
| 1                          | 1    | Shavings Charly                   | 17.00                     | 21.50               | 05.45                     | 475                         |
| 1                          | 1    | Shavings Henry                    | 17.00                     | 22.20               | 05.45                     | 445                         |
| 1                          | 1    | Shavings Chestnut                 | 17.00                     | 23.00               | 05.45                     | 405                         |
| 1                          | 2    | Shavings Colinda                  | 18.03                     | 22.00               | 7.15                      | 555                         |
| 1                          | 2    | Shavings Alisha                   | 18.04                     | 22.33               | 7.15                      | 522                         |
| 1                          | 2    | Shavings Mistou                   | 18.10                     | 22.08               | 7.15                      | 547                         |
| 1                          | 2    | Shavings Stanley                  | 18.04                     | 21.30               | 7.15                      | 585                         |
| 1                          | 2    | Shavings Dilano                   | 18.05                     | 23.15               | 7.15                      | 480                         |
| 1                          | 3    | Shavings Whoopi                   | 16.47                     | 22.10               | 6.55                      | 525                         |
| 1                          | 3    | Shavings Lukas                    | 16.47                     | 22.45               | 6.55                      | 490                         |
|                            | 3    | Shavings Piccolina                | 16.40                     | 22.40               | 6.55                      | 495                         |
| 1                          | 4    | Shavings Dun horse                | 17.22                     | 21.53               | 05.10                     | 437                         |
| 1                          | 4    | Shavings Gray horse               | 17.22                     | 20.30               | 05.10                     | 520                         |
|                            | 4    | Shavings Fleabitten grey horse I  | 17.29                     | 21.10               | 05.10                     | 480                         |
|                            | 4    | Shavings Bayard                   | 17.28                     | 20.46               | 05.10                     | 456                         |
|                            | 4    | Shavings Fleabitten grey horse II | 17.25                     | 21.58               | 05.10                     | 432                         |
| 1                          | 5    | Shavings Cindy                    | 15.30                     | 22.10               | 7.00                      | 539                         |
| 1                          | 5    | Shavings horse left               | 17.15                     | 20.17               | 7.00                      | 643                         |
| 1                          | 5    | Shavings horse rech               | 16.27                     | 22.30               | 7.00                      | 510                         |
|                            | 5    | Shavings Chestnut                 | 15.30                     | 17.37               | 7.00                      | 803                         |
|                            | 5    | Shavings Barry                    | 15.40                     | 18.40               | 7.00                      | 740                         |

|   |   |                          |       |       |      |     |
|---|---|--------------------------|-------|-------|------|-----|
|   | 5 | Shavings Fleabitten grey | 15.40 | 22.00 | 7.00 | 540 |
| 1 | 6 | Shavings Double Beat     | 17.17 | 22.50 | 7.00 | 530 |
| 1 | 6 | Shavings Promi           | 17.17 | 20.14 | 7.00 | 646 |
| 1 | 6 | Shavings Raika           | 17.17 | 21.16 | 7.00 | 584 |
| 1 | 6 | Shavings Carlos          | 17.17 | 22.50 | 7.00 | 530 |
| 1 | 6 | Shavings Vivien          | 17.17 | 20.32 | 7.00 | 688 |
| 1 | 6 | Shavings Manni           | 17.17 | 21.40 | 7.00 | 560 |
|   | 6 | Shavings Henry           | 17.15 | 22.00 | 7.00 | 540 |
|   | 6 | Shavings Nala            | 17.13 | 22.30 | 7.00 | 510 |
|   | 6 | Shavings Raminia         | 17.15 | 21.30 | 7.00 | 570 |
|   | 6 | Shavings Whisky          | 17.13 | 22.00 | 7.00 | 540 |
|   | 6 | Shavings Dihlara         | 17.13 | 22.00 | 7.00 | 540 |
| 1 | 7 | Shavings Clyde           | 17.04 | 23.15 | 6.30 | 435 |
| 1 | 7 | Shavings Sunny           | 17.05 | 18.45 | 6.30 | 705 |
| 1 | 7 | Shavings Candy Girl      | 17.04 | 19.19 | 6.30 | 671 |
|   | 7 | Shavings Cassandra       | 17.13 | 20.26 | 6.30 | 614 |
|   | 7 | Shavings Pellegrino      | 19.00 | 23.30 | 6.30 | 420 |
|   | 7 | Shavings Rosco           | 19.00 | 21.30 | 6.30 | 540 |
|   | 7 | Shavings Zelela          | 17.14 | 22.05 | 6.30 | 445 |
|   | 7 | Shavings Heron           | 17.24 | 22.05 | 6.30 | 445 |
|   | 7 | Shavings Ramira          | 17.24 | 21.10 | 6.30 | 560 |
|   | 7 | Shavings Lupino          | 17.18 | 21.05 | 6.30 | 565 |
|   | 7 | Shavings Askadron        | 17.14 | 20.55 | 6.30 | 575 |
|   | 7 | Shavings Kalimero        | 17.23 | 22.05 | 6.30 | 445 |
| 1 | 8 | Shavings Luna            | 17.03 | 21.10 | 5.30 | 500 |
| 1 | 8 | Shavings Souris          | 16.59 | 21.30 | 5.30 | 480 |
|   | 8 | Shavings Angelo          | 16.52 | 22.00 | 5.30 | 450 |
|   | 8 | Shavings Finale          | 16.51 | 21.45 | 5.30 | 465 |
|   | 8 | Shavings Cara Donna      | 17.00 | 22.00 | 5.30 | 450 |
|   | 8 | Shavings Jaguar          | 16.42 | 22.10 | 5.30 | 440 |

|           |   |                          |       |       |      |        |
|-----------|---|--------------------------|-------|-------|------|--------|
|           | 8 | Shavings Petja           | 16.42 | 20.31 | 5.30 | 539    |
| <b>29</b> |   | <b>CO and DCO-horses</b> |       |       |      |        |
| <b>26</b> |   | <b>AR-horses</b>         |       |       |      |        |
|           |   | Mean                     |       |       |      | 529.89 |
|           |   | Standard deviation       |       |       |      | 85.38  |
|           |   | Median                   |       |       |      | 525    |
|           |   | Min                      |       |       |      | 405    |
|           |   | Max                      |       |       |      | 803    |
|           |   | N                        |       |       |      | 55     |

**Table S4: Frequency of pauses, duration of pauses and latency until first feed intake pause during evening meal**

| Farm | Bedding | Horse      | Latency until the first feed intake pause (in min) | Number of feed intake pauses (n) | Duration of feed intake pause (in min) |
|------|---------|------------|----------------------------------------------------|----------------------------------|----------------------------------------|
| 1    | shaving | shaving 1  | 109                                                | 1                                | 1                                      |
| 1    | shaving | shaving 2  | 334                                                | 0                                | 0                                      |
| 1    | shaving | shaving 3  | 169                                                | 5                                | 6.4                                    |
| 1    | shaving | shaving 4  | 157                                                | 1                                | 1                                      |
| 1    | shaving | shaving 5  | 290                                                | 0                                | 0                                      |
| 1    | shaving | shaving 6  | 70                                                 | 3                                | 19.3                                   |
| 1    | straw   | straw 1    | 62                                                 | 1                                | 15                                     |
| 1    | straw   | straw 2    | 33                                                 | 3                                | 16                                     |
| 1    | straw   | straw 3    | 47                                                 | 4                                | 25                                     |
| 1    | straw   | straw 4    | 134                                                | 3                                | 5                                      |
| 2    | shaving | shaving 7  | 164                                                | 3                                | 12.3                                   |
| 2    | shaving | shaving 8  | 71                                                 | 7                                | 6.4                                    |
| 2    | shaving | shaving 9  | 167                                                | 4                                | 6.5                                    |
| 2    | shaving | shaving 10 | 71                                                 | 3                                | 20.3                                   |

|           |            |     |    |      |
|-----------|------------|-----|----|------|
| 2 shaving | shaving 11 | 251 | 1  | 46   |
| 2 straw   | straw 5    | 149 | 3  | 3.3  |
| 2 straw   | straw 6    | 152 | 1  | 1    |
| 3 shaving | shaving 12 | 35  | 3  | 31.7 |
| 3 straw   | straw 7    | 26  | 3  | 3.7  |
| 3 straw   | straw 8    | 336 | 0  | 0    |
| 3 straw   | straw 9    | 420 | 0  | 0    |
| 4 shaving | shaving 13 | 231 | 3  | 5    |
| 4 shaving | shaving 14 | 132 | 0  | 0    |
| 4 straw   | straw 10   | 87  | 8  | 15.4 |
| 4 straw   | straw 11   | 95  | 4  | 19.5 |
| 4 straw   | straw 12   | 157 | 7  | 5.7  |
| 5 shaving | shaving 15 | 70  | 5  | 7.2  |
| 5 shaving | shaving 16 | 120 | 1  | 1    |
| 5 shaving | shaving 17 | 363 | 0  | 0    |
| 5 straw   | straw 13   | 45  | 4  | 17   |
| 5 straw   | straw 14   | 104 | 12 | 10.8 |
| 5 straw   | straw 15   | 70  | 16 | 7.6  |
| 6 shaving | shaving 18 | 123 | 5  | 18.2 |
| 6 shaving | shaving 19 | 83  | 6  | 20.5 |
| 6 shaving | shaving 20 | 158 | 1  | 9    |
| 6 shaving | shaving 21 | 123 | 4  | 6    |
| 6 shaving | shaving 22 | 195 | 0  | 0    |
| 6 shaving | shaving 23 | 231 | 1  | 12   |
| 6 straw   | straw 16   | 135 | 2  | 34.5 |
| 6 straw   | straw 17   | 132 | 4  | 7    |
| 6 straw   | straw 18   | 223 | 1  | 10   |
| 7 shaving | shaving 24 | 100 | 0  | 0    |
| 7 shaving | shaving 25 | 135 | 0  | 0    |
| 7 straw   | straw 19   | 126 | 5  | 22.6 |
| 7 straw   | straw 20   | 89  | 5  | 21.6 |

|            |            |     |   |      |
|------------|------------|-----|---|------|
| 7 straw    | straw 21   | 46  | 9 | 20.1 |
| 7 straw    | straw 22   | 162 | 3 | 20   |
| 7 straw    | straw 23   | 127 | 4 | 26.3 |
| 7 straw    | straw 24   | 56  | 8 | 14.4 |
| 7 straw    | straw 25   | 104 | 6 | 17.5 |
| 8 shaving  | shaving 26 | 67  | 8 | 12.9 |
| 9 shaving  | shaving 27 | 89  | 3 | 28.3 |
| 9 shaving  | shaving 28 | 169 | 2 | 9    |
| 9 shaving  | shaving 29 | 111 | 4 | 24.3 |
| 10 shaving | shaving 30 | 203 | 4 | 28.5 |

**Table S5: Number of feed intake pauses dependent on bedding**

| Horse | Bedding    | Feed intake pause (n) |
|-------|------------|-----------------------|
|       | 1 shaving  | 0                     |
|       | 2 shaving  | 0                     |
|       | 3 shaving  | 0                     |
|       | 4 shaving  | 0                     |
|       | 5 shaving  | 0                     |
|       | 6 shaving  | 0                     |
|       | 7 shaving  | 0                     |
|       | 8 shaving  | 1                     |
|       | 9 shaving  | 1                     |
|       | 10 shaving | 1                     |
|       | 11 shaving | 1                     |
|       | 12 shaving | 1                     |
|       | 13 shaving | 1                     |
|       | 14 shaving | 1                     |

No feed intake pause = 0 (7/30 horses on shavings; 2/25 horses on straw)  
One or more feed intake pauses = 1



|    |         |   |
|----|---------|---|
| 15 | shaving | 1 |
| 16 | shaving | 1 |
| 17 | shaving | 1 |
| 18 | shaving | 1 |
| 19 | shaving | 1 |
| 20 | shaving | 1 |
| 21 | shaving | 1 |
| 22 | shaving | 1 |
| 23 | shaving | 1 |
| 24 | shaving | 1 |
| 25 | shaving | 1 |
| 26 | shaving | 1 |
| 27 | shaving | 1 |
| 28 | shaving | 1 |
| 29 | shaving | 1 |
| 30 | shaving | 1 |
| 31 | straw   | 0 |
| 32 | straw   | 0 |
| 33 | straw   | 1 |
| 34 | straw   | 1 |
| 35 | straw   | 1 |
| 36 | straw   | 1 |
| 37 | straw   | 1 |
| 38 | straw   | 1 |
| 39 | straw   | 1 |
| 40 | straw   | 1 |
| 41 | straw   | 1 |
| 42 | straw   | 1 |
| 43 | straw   | 1 |
| 44 | straw   | 1 |
| 45 | straw   | 1 |
| 46 | straw   | 1 |

|    |       |   |
|----|-------|---|
| 47 | straw | 1 |
| 48 | straw | 1 |
| 49 | straw | 1 |
| 50 | straw | 1 |
| 51 | straw | 1 |
| 52 | straw | 1 |
| 53 | straw | 1 |
| 54 | straw | 1 |
| 55 | straw | 1 |
